# Supplementary material
Source: publisher site journal article supplement (https://www.spandidos-publications.com/1680/downloadSupplementary)
Supplement: Supplementary file 1 [file downloadSupplementary]

## Sheet: Table S3
Table SIII. A full list of all mature miRNAs that passed filter on normality with ShapiroﾐWilk (p > 0.95)
Gene ID	Accession	Entrez ID	Ensembl ID	Gene Type	DB Refs
MI0000749_1	hsa-miR-30e-5p	407034		miRNA	miRBase:MI0000749
MI0003776_1	hsa-miR-320b	100302117	ENSG00000211543	miRNA	miRBase:MI0003776
MI0005767_1	hsa-miR-942-5p	100126331		miRNA	miRBase:MI0005767
MI0003560_2	hsa-miR-92b-3p	693235	ENSG00000271748	miRNA	miRBase:MI0003560
MI0000107_1	hsa-miR-29b-3p	407025	ENSG00000207790	miRNA	miRBase:MI0000107|RFAM:RF00074
MI0003839_1	hsa-miR-320b	100313769		miRNA	miRBase:MI0003839
MI0017414_2	hsa-miR-4772-3p	100616157		miRNA	miRBase:MI0017414
MI0000447_1	hsa-miR-128-1-5p	406915		miRNA	miRBase:MI0000447
MI0001448_1	hsa-miR-425-3p	494337	ENSG00000199032	miRNA	miRBase:MI0001448
MI0000086_1	hsa-miR-28-5p	407020		miRNA	miRBase:MI0000086
MI0000086_2	hsa-miR-28-3p	407020		miRNA	miRBase:MI0000086
MI0005532_1	hsa-miR-874-3p	100126343		miRNA	miRBase:MI0005532
MI0000786_1	hsa-miR-378a-5p	494327		miRNA	miRBase:MI0000786
MI0000815_2	hsa-miR-339-5p	442907		miRNA	miRBase:MI0000815
MI0000253_2	hsa-miR-148a-5p	406940	ENSG00000199085	miRNA	miRBase:MI0000253
MI0000082_1	hsa-miR-25-3p	407014		miRNA	miRBase:MI0000082
MI0000082_2	hsa-miR-25-5p	407014		miRNA	miRBase:MI0000082
MI0000095_1	hsa-miR-93-3p	407050		miRNA	miRBase:MI0000095
MI0000816_2	hsa-miR-335-3p	442904		miRNA	miRBase:MI0000816
MI0000105_1	hsa-miR-29b-3p	407024	ENSG00000207748	miRNA	miRBase:MI0000105|RFAM:RF00074
MI0003610_1	hsa-miR-598-3p	693183		miRNA	miRBase:MI0003610
MI0022688_2	hsa-miR-6842-3p			miRNA	miRBase:MI0022688
MI0000809_1	hsa-miR-151a-3p	442893		miRNA	miRBase:MI0000809
MI0000060_2	hsa-let-7a-3p	406881	ENSG00000199165	miRNA	miRBase:MI0000060|RFAM:RF00027
MI0000080_2	hsa-miR-24-3p	407012		miRNA	miRBase:MI0000080
MI0000090_2	hsa-miR-32-5p	407036		miRNA	miRBase:MI0000090
MI0003129_1	hsa-miR-146b-5p	574447	ENSG00000202569	miRNA	miRBase:MI0003129
MI0006444_2	hsa-miR-1307-5p	100302174	ENSG00000221767	miRNA	miRBase:MI0006444
MI0006344_2	hsa-miR-548e-3p	100313921		miRNA	miRBase:MI0006344
MI0000448_2	hsa-miR-130a-3p	406919	ENSG00000208009	miRNA	miRBase:MI0000448
MI0000808_1	hsa-miR-326	442900		miRNA	miRBase:MI0000808
MI0000434_2	hsa-let-7i-3p	406891	ENSG00000199179	miRNA	miRBase:MI0000434
MI0000076_1	hsa-miR-20a-5p	406982	ENSG00000215417	miRNA	miRBase:MI0000076
MI0003639_2	hsa-miR-625-3p	693210	ENSG00000207781	miRNA	miRBase:MI0003639
MI0003772_1	hsa-miR-151b	100616247	ENSG00000265154	miRNA	miRBase:MI0003772
MI0000472_2	hsa-miR-127-3p	406914	ENSG00000207608	miRNA	miRBase:MI0000472
MI0003675_1	hsa-miR-411-5p	693121	ENSG00000199109	miRNA	miRBase:MI0003675
MI0003676_2	hsa-miR-654-3p	724024	ENSG00000207934	miRNA	miRBase:MI0003676
MI0025242_1	hsa-miR-7706			miRNA	miRBase:MI0025242
MI0000456_1	hsa-miR-140-5p	406932		miRNA	miRBase:MI0000456
MI0001445_1	hsa-miR-423-5p	494335		miRNA	miRBase:MI0001445
MI0000081_1	hsa-miR-24-3p	407013	ENSG00000267519	miRNA	miRBase:MI0000081
MI0000079_1	hsa-miR-23a-3p	407010	ENSG00000207980	miRNA	miRBase:MI0000079
MI0000066_1	hsa-let-7e-5p	406887	ENSG00000198972	miRNA	miRBase:MI0000066|RFAM:RF00027
MI0000469_1	hsa-miR-125a-5p	406910	ENSG00000208008	miRNA	miRBase:MI0000469
MI0000062_2	hsa-let-7a-3p	406883	ENSG00000198986	miRNA	miRBase:MI0000062|RFAM:RF00027
MI0000299_1	hsa-miR-222-3p	407007	ENSG00000207725	miRNA	miRBase:MI0000299
MI0003205_1	hsa-miR-532-5p	693124		miRNA	miRBase:MI0003205
MI0000762_1	hsa-miR-362-5p	574030		miRNA	miRBase:MI0000762
MI0003782_2	hsa-miR-1468-5p	100302115	ENSG00000222532	miRNA	miRBase:MI0003782
MI0003685_1	hsa-miR-421	693122	ENSG00000202566	miRNA	miRBase:MI0003685
MI0000760_2	hsa-miR-361-5p	494323		miRNA	miRBase:MI0000760
MI0000764_1	hsa-miR-363-3p	574031	ENSG00000207572	miRNA	miRBase:MI0000764
MI0000113_2	hsa-miR-106a-5p	406899	ENSG00000207602	miRNA	miRBase:MI0000113|RFAM:RF00051
